# 1 **Cortical idiosyncrasies predict the subjective experience of object size**

2

3 Christina Moutsiana<sup>1\*</sup>, Benjamin de Haas<sup>1,2\*</sup>, Andriani Papageorgiou<sup>1</sup>, Jelle A. van Dijk<sup>1,2</sup>, Annika  
4 Balraj<sup>1,3</sup>, John A. Greenwood<sup>1</sup> & D. Samuel Schwarzkopf<sup>1,2#</sup>

5

6 <sup>1</sup> Experimental Psychology, University College London, 26 Bedford Way, London, U.K.

7 <sup>2</sup> UCL Institute of Cognitive Neuroscience, 17 Queen Square, London, U.K.

8 <sup>3</sup> Columbian College of Arts and Sciences, The George Washington University, 2125 G St. NW,  
9 Washington, 20052, U.S.A.

10

11 \* These authors contributed equally

12 # To whom all correspondence should be directed

13

## 14 **Abstract**

15 *Perception is subjective. Even basic judgments, like those of visual object size, vary substantially*  
16 *between observers and also across the visual field within the same observer. How the visual system*  
17 *determines the size of objects remains unclear. We hypothesize that size is inferred directly from*  
18 *stimulus representations in V1 and predict that idiosyncrasies in cortical architecture should explain*  
19 *individual differences in size judgments. Indeed, using novel behavioral methods we demonstrate*  
20 *that biases in size perception are related to both the spatial tuning of neuronal populations and local*  
21 *cortical magnification in V1, as measured with functional magnetic resonance imaging in healthy*  
22 *volunteers. Our results indicate that the visual system infers size from V1 representations and that*  
23 *individual perception of even simple stimuli is warped by idiosyncrasies in brain organization.*

24

## 25 **Introduction**

26 The possibility that the apparent size of objects could be inferred from the cortical representation in  
27 area V1 (Schwarzkopf, 2015) is supported by the observation that the spatial spread of neural

28 activity in this area is related to apparent size under a range of contextual modulations (Murray et  
29 al., 2006; Fang et al., 2008; Sperandio et al., 2012; Pooresmaeili et al., 2013). Indeed, both the  
30 strength of contextual illusions and the objective discrimination of visual stimuli have recently been  
31 linked to the spatial extent of the cortical area in V1 that represents the central visual field  
32 (Schwarzkopf et al., 2011; Schwarzkopf and Rees, 2013; Song et al., 2013b). This hypothesis,  
33 however, makes an essential prediction that these findings fail to address: tuning properties of local  
34 neuronal populations in V1 should explain idiosyncratic biases in *basic size perception* in the absence  
35 of contextual illusions.

36 To test this we developed the Multiple Alternative Perceptual Search (MAPS) task. This approach  
37 combines a matching task with analyses similar to reverse correlation (Abbey and Eckstein, 2002; Li  
38 et al., 2004), thus minimizing decision confounds when measuring subjective appearance (Morgan et  
39 al., 2012, 2013; Jogan and Stocker, 2014). It estimates perceptual biases while several stimuli are  
40 presented simultaneously. We consider this a more naturalistic task, akin to our daily perceptual  
41 judgments (Figure 1A), compared with traditional psychophysical tasks involving single, isolated  
42 objects.

43

## 44 **Results and Discussion**

### 45 *Idiosyncratic biases in size perception*

46 Thirteen normal, healthy participants viewed an array of 5 circles on each trial and made a  
47 perceptual judgment (Figure 1B). The central circle was constant in size and served as the reference.  
48 Participants reported which of the four target circles appeared most similar in size to the reference.  
49 We fit a model to explain each participant's behavioral responses. For each of the four target  
50 locations we modeled the output of a detector tuned to stimulus size. In each trial the detector  
51 showing the strongest response predicted the participant's behavioral choice. This procedure thus  
52 estimated the raw perceptual bias and uncertainty at each location (Figure 1 – figure supplement 1).

53 Peripheral stimuli appeared smaller on average than the central reference, confirming earlier reports  
54 (Helmholtz, 1867; Bedell and Johnson, 1984; Anstis, 1998). This reduction in apparent size increased  
55 with stimulus eccentricity (Figure 1C). When instead of isolated circles we presented the target  
56 circles inside larger concentric circles, perceptual biases were predictably shifted in the other  
57 direction (the Delboeuf illusion; Delboeuf, 1892) so that targets appeared on average larger than the  
58 reference (Figure 1C). This, however, interacted with the effect of eccentricity on apparent size, with  
59 a gradual reduction in (illusory) size as the stimuli moved into the periphery. In the classical Delboeuf

60 illusion, perceptual biases are compared to a reference, either at the same eccentricity or even at  
61 the same *stimulus location*. In contrast, in our task the reference is at fixation. To disentangle the  
62 illusion from the effect of eccentricity, we therefore also calculated the *classical Delboeuf illusion*  
63 *strength*, that is, the difference in perceptual bias for isolated circles and the illusion stimuli at each  
64 location. This effect (here an *increase* in apparent size) also increased with eccentricity (Figure 1C).

65 Importantly, we further analyzed the *idiosyncratic patterns* of perceptual biases within each  
66 participant, both for isolated circles and for Delboeuf stimuli. Biases were very strongly correlated  
67 for both conditions and across the three eccentricities tested (Figure 1D and Figure 1 – figure  
68 supplements 2-3). That is, if observers perceived a large reduction in the apparent size of an isolated  
69 stimulus at a given location, they tended to show large reductions both for isolated circle and  
70 Delboeuf stimuli within the same visual field quadrant, regardless of eccentricity. We further  
71 confirmed that bias estimates were highly reliable by comparing bias estimates from two sessions  
72 conducted on different days (Figure 1 – figure supplement 4).

### 73 *Long-term reliability of bias estimates*

74 Nine participants who had taken part in the size eccentricity bias experiment also participated in the  
75 artificial size bias experiment approximately one year later. Despite the long time between these  
76 experiments and the fact that stimulus values were sampled differently (see Materials and Methods)  
77 the estimates of perceptual biases at target eccentricity 3.92° (which was common to both  
78 experiments) were well correlated between them ( $r=0.37$ ,  $p=0.028$ ). This correlation was largely  
79 driven by the within-subject variance. It was considerably greater after subtracting the mean across  
80 the four targets for every condition ( $r=0.58$ ,  $p=0.0002$ ). In contrast, removing the within-subject  
81 variance by averaging bias estimates across the four targets reduced the correlation substantially  
82 ( $r=0.22$ ,  $p=0.5759$ ).

### 83 *Perceptual biases correlate with spatial tuning in V1*

84 Next we employed functional magnetic resonance imaging (fMRI) with population receptive field  
85 (pRF) mapping to estimate the tuning of V1 voxels to spatial position (Figure 2A-B; Dumoulin and  
86 Wandell, 2008; Schwarzkopf et al., 2014). Interestingly, this revealed a systematic relationship  
87 between pRF size and perceptual biases: both isolated circles (pooled across eccentricity:  $r=0.41$ ,  
88  $p<0.0001$ ; Figure 2C-E) and Delboeuf stimuli ( $r=0.34$ ,  $p=0.0001$ ; Figure 2F-I) were perceived as  
89 smaller when they were presented at visual field locations covered by voxels with larger pRFs. This  
90 pattern was also present across the visual field when data were averaged across participants:  
91 increasing eccentricity gives both an increase in pRF size (Dumoulin and Wandell, 2008; Schwarzkopf

92 et al., 2014) and a decrease in apparent size. Our data now demonstrate that this is also true for  
93 *idiosyncratic variations* in both pRF and apparent size at a *fixed* eccentricity.

94 The fact that apparent size of our circle stimuli is smaller when pRFs are larger could directly follow  
95 from the hypothesis that object size is inferred from the spatial position of neuronal activity inside  
96 the retinotopic map. Larger pRFs give a coarser retinotopic representation of the stimulus, with a  
97 greater spread of activation in the representation of the object's edges. It is possible that a decoding  
98 mechanism (e.g. based in higher brain regions involved in perceptual decisions) is required to 'read  
99 out' the position of the circle edges based on this activation (Pouget et al., 2000). Provided that the  
100 stimulus is so small that cortical receptive fields undersample it (as should be the case in our  
101 experiments), as pRF size increases the activity from the opposing edges of the circle would  
102 increasingly overlap thus shifting the resulting position estimates closer together. This in turn results  
103 in a reduction in apparent size. Alternatively, the less precise stimulus representation with larger  
104 pRFs may simply interact with the concordant reduction in local cortical magnification. Higher-level  
105 decoding mechanisms would thus consistently underestimate the size of the stimulus because they  
106 are inadequately calibrated to the idiosyncratic differences in cortical magnification (Anstis, 1998).

#### 107 *Dissociation between basic perceptual bias and contextual illusions*

108 In an indirect replication of our earlier findings (Schwarzkopf et al., 2011; Schwarzkopf and Rees,  
109 2013; Song et al., 2013b), we also observed an inverse relationship between classical Delboeuf  
110 illusion strength and V1 area ( $r=-0.31$ ,  $p=0.0006$ ; Figure 3A-C). Raw perceptual biases for isolated  
111 circles also correlated with V1 area ( $r=0.27$ ,  $p=0.0032$ ; Figure 3D-F). In contrast, raw biases for  
112 Delboeuf stimuli (relative to the central reference) were not correlated with V1 area ( $r=-0.09$ ,  
113  $p=0.3063$ ; Figure 3G-I). Because the classical Delboeuf illusion is the *difference* in apparent size  
114 between these stimuli at the *same location*, it instead reflects the contextual interaction between  
115 target and surround.

116 The bias induced by the illusion thus likely differs mechanistically from basic perceptual biases. As  
117 our main findings show, both isolated circles (Figure 2C-E) and Delboeuf stimuli (Figure 2F-I) were  
118 perceived as smaller when pRFs were large – however, *at the same location* Delboeuf stimuli were  
119 nonetheless seen as larger than isolated circles. However, even though the apparent size of both  
120 isolated circles and Delboeuf stimuli was linked to pRF size, the *difference* between them was  
121 correlated with V1 surface area only.

122 The illusion effect may be modulated by cortical distance, possibly via lateral intra-cortical  
123 connections (Song et al., 2013a; Schwarzkopf, 2015), rather than pRF size. We conjectured

124 previously that the illusion could arise due to local connectivity between V1 neurons encoding the  
125 target circle and the surrounding context. Thus the illusion may be weaker when V1 surface area  
126 (and thus cortical distance) is larger (Schwarzkopf et al., 2011; Schwarzkopf and Rees, 2013; Song et  
127 al., 2013a, 2013b). In contrast, basic perceptual biases for any stimulus seem to be linked to the  
128 coarseness (pRF size) of the retinotopic stimulus representation itself.

129 Taken together, these results indicate that different mechanisms influence apparent size: both  
130 isolated circles and Delboeuf stimuli generally appear smaller (relative to the central reference)  
131 when pRFs are large, but an increase in cortical surface area (and thus the scale required of intra-  
132 cortical connections) is associated with a decrease in the illusory modulation of perceived size.  
133 Because our task estimates perceptual biases under either condition relative to a *constant*  
134 reference, it was uniquely suited to reveal dissociations between these effects. A more traditional  
135 task in which reference stimuli are presented at matched locations/eccentricities would be  
136 insensitive to this difference.

#### 137 *MAPS reliably detects perceptual biases*

138 Our results thus demonstrate a neural correlate of apparent size even for simple, non-contextual  
139 stimuli. However, because it is difficult to disentangle *perceptual* biases from *response* or *decision*  
140 biases (Morgan et al., 2012), we next ran a series of control experiments to validate the perceptual  
141 bias estimates from MAPS. Participants performed four runs of the experiments with circles  
142 presented at the intermediate eccentricity of 3.92°. In two of these runs we introduced artificial  
143 biases to test how well MAPS performed when the ground truth was known. In these runs, two of  
144 the four target stimuli were altered subtly without the participants' knowledge. In one experiment  
145 one target was physically larger while the other was smaller. In another experiment participants  
146 instead judged the orientation of small grating patches. Here one of the gratings was tilted 5°  
147 clockwise while another was tilted 5° counterclockwise relative to the reference. In both  
148 experiments MAPS reliably identified the locations with artificial biases although the magnitude of  
149 the estimated bias was smaller than the physically introduced bias (Figure 4).

#### 150 *Results from MAPS are consistent with traditional psychophysics*

151 Next we compared perceptual biases estimated with MAPS with those measured with the traditional  
152 method of constant stimuli (MCS). Participants completed two runs of MAPS followed by an  
153 experiment with a MCS design: in different blocks of the experiment participants were instructed to  
154 attend to only one of the four target circles. They then judged whether this target was larger or  
155 smaller than the central reference circle (Figure 5A). We estimated the perceptual bias at each

156 location by fitting a cumulative Gaussian curve to the behavioral responses. The bias estimates from  
157 this experiment correlated strongly with those from MAPS (Figure 5B). However, under MAPS the  
158 magnitude of biases was reduced significantly ( $t(7)=7.5$ ,  $p<0.0002$ ), consistent with conservative  
159 biases observed in the artificial bias experiments (Figure 4).

#### 160 *Spatial attention modulates perceptual biases*

161 The more conservative biases observed with MAPS may be related to prior observations that  
162 judgements of multiple simultaneous items shifts biases towards the set average (Ariely, 2001;  
163 Parkes et al., 2001; Chong and Treisman, 2003; Walker and Vul, 2014): MAPS requires participants to  
164 attend to four locations simultaneously; in the MCS attention is always focused on single targets.  
165 This could affect perceptual biases. Results from another control experiment in which we presented  
166 an attentional cue at a given location briefly before stimulus onset are consistent with this  
167 interpretation: perceptual biases were enhanced subtly for the cued location (Figure 6A) while the  
168 frequency with which participants chose the cued location was unaltered (Figure 6B).

#### 169 *Biases measured with MAPS are less conspicuous*

170 To further investigate this possibility, we conducted a two-alternative forced choice (2AFC)  
171 experiment to test whether biases estimated by MAPS or MCS were a closer match to the  
172 participants' subjective experience. In each trial participants were presented sequentially with two  
173 stimulus arrays separated by a blank interval (Figure 7A). One stimulus contained five equally sized  
174 circles (the unbiased stimulus). The other contained circles whose sizes had been altered according  
175 to the perceptual biases measured either with MAPS or MCS, multiplied by a factor ('bias factor').  
176 Participants judged which interval contained the unbiased stimulus. Unsurprisingly, when biases  
177 were doubled, tripled or inverted, participants could reliably detect that difference (Figure 7B).  
178 Conversely, when both stimuli were unbiased (bias factor 0) participants performed at chance.  
179 However, when participants saw a stimulus constructed from the actual bias estimates (bias factor  
180 1) they were able to distinguish the biased and unbiased stimuli derived from MCS better than those  
181 derived from MAPS ( $t(7)=-3.43$ ,  $p=0.011$ ).

182 Importantly, this was not trivially explained by greater task difficulty due to the smaller bias  
183 estimates from MAPS: Theoretically, the differences between MAPS and MCS in the 2AFC  
184 experiment could have arisen because the task was more difficult since biases estimated by MAPS  
185 were smaller than those estimated by MCS. However, greater difficulty should result in performance  
186 symmetric around a bias factor of zero. This was not the case as performance at negative bias  
187 factors was consistently above chance. Most notably, participants were able to distinguish inverted

188 MAPS biases (bias factor -1) significantly above chance levels ( $t(7)=2.55$ ,  $p=0.038$ ) while performance  
189 for the actual MAPS biases (bias factor 1) was at chance ( $t(7)=0.88$ ,  $p=0.41$ ), and the difference  
190 between these two points was also significant ( $t(7)=2.46$ ,  $p=0.043$ ). Thus MAPS provided a  
191 somewhat closer estimate of participants' subjective experience of the circles in the array and  
192 suggests that the array configuration indeed reduced perceptual biases as predicted by our  
193 attentional cueing experiment and previous findings (Ariely, 2001; Parkes et al., 2001; Chong and  
194 Treisman, 2003; Walker and Vul, 2014).

#### 195 *Heterogeneity in perceptual biases has central origin*

196 Naturally, the spatial heterogeneity in perceptual biases could possibly arise from factors prior to  
197 visual cortical processing, like small corneal aberrations or inhomogeneity in retinal organization. We  
198 tested this possibility in a final control experiment in which we measured perceptual biases while we  
199 presented the stimuli either binocularly or dichoptically to the left and right eye. There was a close  
200 correspondence between biases measured with either eye (Figure 8). Thus at least a large part of the  
201 variance in perceptual biases must arise at a more central stage of visual processing where the input  
202 from both eyes has converged, such as the binocular cells in V1.

#### 203 *Conclusions*

204 Our experiments show that when the spatial tuning of neuronal populations in V1 is coarser, visual  
205 objects are experienced as *smaller*. These findings support the hypothesis that object size is inferred  
206 directly from retinotopic representations in V1 (Schwarzkopf, 2015) and thus provides an  
207 explanation for previous reports of a neural signature of apparent size in V1 responses (Murray et  
208 al., 2006; Fang et al., 2008; Sperandio et al., 2012; Pooresmaeili et al., 2013). Taking advantage of  
209 our unique task design, we further demonstrate that processes related to basic perceptual biases are  
210 dissociable from contextual effects, like the Delboeuf illusion: While raw perceptual biases of object  
211 size are explained by pRF size, V1 surface area (as a proxy for cortical distance) explains the  
212 contextual modulation of apparent size in these illusions. Lastly, our findings imply that  
213 measurements of functional brain architecture in sensory areas can predict individual differences in  
214 our subjective experience of the world.

215

216

## 217 **Materials and Methods**

### 218 Participants

219 The authors and several naïve observers participated in these experiments. All participants were  
220 healthy and had normal or corrected-to-normal visual acuity. All participants gave written informed  
221 consent and procedures were approved by the UCL Research Ethics Committee.

222 Ten participants (4 authors; 3 female; 2 left-handed; ages 24-37) took part in both the first  
223 behavioral experiment measuring perceptual biases at 3 eccentricities and in the fMRI retinotopic  
224 mapping experiment (henceforth, *size eccentricity bias* experiment). An additional 3 participants (1  
225 female; all right-handed; ages 20-25) took part in behavioral experiments only but could not be  
226 recruited for the fMRI sessions. These fMRI data form also part of a different study investigating the  
227 inter-session reliability of pRF analysis that we are preparing for a separate publication.

228 Fifteen participants (4 authors; 7 female; 1 left-handed; ages 20-37) took part in an additional  
229 behavioral experiment measuring perceptual biases in size perception with or without artificially  
230 induced biases (*artificial size bias*). 10 participants (1 author; 4 female; 2 left-handed; ages 21-32)  
231 took part in the artificial bias experiment using orientation discrimination (*artificial orientation bias*).  
232 Eight participants (4 authors; 2 female; 1 left-handed) participated in the experiment comparing  
233 perceptual biases measured with different tasks (*comparing tasks*). Eighteen participants (6 authors;  
234 8 female; 1 left-handed; ages 21-42) participated in the attentional cueing experiment (*attentional*  
235 *cueing*). Finally, 6 participants (5 authors; 2 female; all right-handed; ages 21-36) participated in the  
236 dichoptic control experiment (*dichoptic bias*).

### 237 General psychophysical procedure

238 Participants were seated in a dark, noise-shielded room in front of a computer screen (Samsung  
239 2233RZ) using its native resolution of 1680 x 1050 pixels and a refresh rate of 120Hz. Minimum and  
240 maximum luminance values were 0.25 and 230cd/m<sup>2</sup>. Head position was held at 48cm from the  
241 screen with a chinrest. Participants used both hands to indicate responses by pressing buttons on a  
242 keyboard.

243 The dichoptic control experiment took place in a different testing room, using an Asus VG278 27”  
244 LCD monitor running its native resolution of 1920 x 1080 pixels and a refresh rate of 120Hz.  
245 Minimum and maximum luminance values were 0.16 and 100cd/m<sup>2</sup>, with a viewing distance of 60  
246 cm ensured with a chinrest. To produce dichoptic stimulation participants wore nVidia 3D Vision 2  
247 shutter goggles synchronized with the refresh rate of the monitor. Frames for left and right eye  
248 stimulation thus alternated at 120Hz.



## 249 Multiple Alternatives Perceptual Search (MAPS) procedure

250 To estimate perceptual biases efficiently at four visual field locations we developed the MAPS  
251 procedure. This is a matching paradigm using analyses related to reverse correlation or classification  
252 image approaches (Abbey and Eckstein, 2002; Li et al., 2004) that seeks to directly estimate the  
253 points of subjective equality, whilst also allowing an inference of discrimination sensitivity.

### 254 *Stimuli*

255 All stimuli were generated and displayed using MATLAB (The MathWorks Inc., Natick, MA) and the  
256 Psychophysics Toolbox version 3 (Brainard, 1997). The stimuli in all the size discrimination  
257 experiments comprised light grey ( $54\text{cd/m}^2$ ) circle outlines presented on a black background. Each  
258 stimulus array consisted of five circles (Figure 1B). One, the *reference*, was presented in the center of  
259 the screen and was always constant in size (diameter:  $0.98^\circ$  visual angle). The remaining four, the  
260 *targets*, varied in size from trial to trial and independently from each other. They were presented at  
261 the four diagonal polar angles and at a distance of  $3.92^\circ$  visual angle from the reference, except for  
262 the size eccentricity bias experiment where target eccentricity could be  $1.96^\circ$ ,  $3.92^\circ$ , or  $7.84^\circ$  visual  
263 angle. To measure the bias under the Delboeuf illusion, a larger inducer circle (diameter:  $2.35^\circ$ )  
264 surrounded each of the four target circles (but not the reference) to produce a contextual  
265 modulation of apparent size.

266 In the artificial orientation bias experiment, the stimuli were five small Gabor patches (sinusoidal  
267 grating with wavelength:  $0.62^\circ$ ; contrast: 50% convolved with a Gaussian envelope with standard  
268 deviation:  $0.49^\circ$ ) presented on a grey background ( $54\text{cd/m}^2$ ). The central patch was the reference  
269 and was oriented either at  $30^\circ$  or  $120^\circ$  counterclockwise from horizontal. The reference orientation  
270 was counterbalanced across participants. From trial to trial the target orientations varied relative to  
271 the reference.

272 In all experiments on size perception, the independent variable (the stimulus dimension used to  
273 manipulate each of the targets) was the binary logarithm of the ratio of diameters for the target  
274 relative to the reference circles. In the size eccentricity bias experiments the sizes of the four targets  
275 were drawn without replacement from a set of fixed sizes ( $0, \pm 0.05, \pm 0.1, \pm 0.15, \pm 0.2, \pm 0.25, \pm 0.5, \pm 0.75$ , or  
276  $\pm 1$  log units). Thus, frequently there was no “correct” target to choose from. Because this made the  
277 task feel quite difficult for many participants, in all the other experiments we decided to select a  
278 random subset of three targets from a Gaussian noise distribution centered on 0 (the  
279 size/orientation of the reference) where one target was correct, i.e. it was set to 0. The standard  
280 deviation of the Gaussian noise was 0.3 log units for size discrimination experiments and  $15^\circ$  for the

281 artificial orientation bias experiment. A subset of 9 participants were tested both in the size  
282 eccentricity bias experiment and the artificial size bias experiment (at 3.92° eccentricity) confirming  
283 that these minor methodological differences did not affect results substantially despite the fact that  
284 these experiments were separated by approximately one year.

### 285 *Tasks*

286 Each trial started with 500ms during which only a fixation dot (diameter: 0.2°) was visible in the  
287 middle of the screen. This was followed by presentation of the stimulus array for 200ms after which  
288 the screen returned to the fixation-only screen. Participants were instructed to make their response  
289 by pressing the F, V, K, or M button on the keyboard corresponding to which of the four targets  
290 appeared most similar to the reference. After their response a “ripple” effect over the target they  
291 had chosen provided feedback about their response. In the size discrimination experiments this  
292 constituted three 50ms frames in which a circle increased in diameter from 0.49° in steps of 0.33°  
293 and in luminance. In the orientation discrimination experiments this was a non-Cartesian grating, a  
294 concentric sinusoidal grating (wavelength: 2.48°) convolved with a Gaussian envelope increasing  
295 from 0.49° in steps of 0.33° and decreasing in contrast from 50% in steps of 10%.

296 Moreover, the color of the fixation dot also changed during these 150ms to provide feedback about  
297 whether the behavioral response was correct. In the size eccentricity bias experiment, the color was  
298 green and slightly larger (0.33°) for correct trials and red for incorrect trials. In all later experiments,  
299 we only provided feedback on *correct* trials. This helped to reduce the anxiety associated with large  
300 numbers of incorrect trials that are common in this task: Accuracy was typically around 45-50%  
301 correct. Even though this is well in excess of chance performance of 25% it means that participants  
302 would frequently make mistakes.

303 Experimental runs were broken up into blocks of 20 trials. After each block there was a resting  
304 break. A message on the screen reminded participants of the task and indicated how many blocks  
305 they had already completed. Participants initiated blocks with a button press.

306 *Size eccentricity bias experiment:* Participants were recruited for two sessions on separate days. In  
307 each session they performed six experimental runs, three with only circles and three with the  
308 Delboeuf stimuli. Each run tested one of the three target eccentricities. Trials with different  
309 eccentricities were run in separate blocks to avoid confounding these measurements with  
310 differences in attentional deployment across different eccentricities. There were 10 blocks per  
311 experimental run.

312 *Artificial size/orientation bias experiments:* Half of the experimental runs participants performed  
313 measured their baseline biases. The other half of the runs contained artificial biases: two of the four  
314 targets were altered subtly, one by adding and one by subtracting 0.1 log units for the artificial size  
315 or 5° for the artificial orientation bias. Which two targets were altered was counterbalanced across  
316 participants, as was the order of experimental runs. In the artificial orientation bias experiment  
317 participants were recruited for two sessions on separate days comprising four runs each (half with  
318 artificial biases). In the artificial size bias experiment participants were recruited for only one session  
319 comprising four runs (two with artificial bias) plus an additional run measuring the Delboeuf stimuli.  
320 There were 10 blocks per experimental run.

321 *Attentional cueing experiment:* In this experiment presentation of the stimulus array was preceded  
322 by a brief attentional cue. This comprised two small dots (diameter: 0.49°) presented at 120% and  
323 83% of the eccentricity along the radial axis between fixation and the cued target location. The  
324 duration of the cue was 60ms followed by 40ms of fixation. There were five experimental conditions:  
325 one for cueing each of the four targets and a baseline condition during which there was no  
326 attentional cue. These conditions were randomly interleaved over the course of the experiment.  
327 Participants were recruited for two sessions on separate days. In each session they performed one  
328 experimental run comprising 50 blocks.

329 *Dichoptic bias experiment:* There were three experimental conditions in this experiment. By means  
330 of shutter goggles the stimulus arrays could be presented dichoptically, either binocularly or  
331 monocularly to either eye. To aid stereoscopic fusion we additionally added 5 concentric squares  
332 surrounding the stimulus arrays (side length: 18.9-98.9° in equal steps). The three experimental  
333 conditions were randomly interleaved within each experimental run. There were 34 blocks per run;  
334 however, in this experiment each block comprised only 12 trials. Participants performed two such  
335 runs within a single session.

### 336 *Analysis*

337 To estimate perceptual biases we fit a model to predict a given participant's behavioral response in  
338 each trial (Figure 1 – figure supplement 1). For each target stimulus location a Gaussian tuning curve  
339 denoted the output of a “neural detector”. The detector producing the strongest output determined  
340 the predicted choice. The model fitted the peak location ( $\mu$ ) and dispersion ( $\sigma$ ) parameters of the  
341 Gaussian tuning curves that minimized the prediction error across all trials. Model fitting employed  
342 the Nelder-Mead simplex search optimization procedure (Lagarias et al., 1998). We initialized the  $\mu$   
343 parameter as the mean stimulus value (size or orientation offset) whenever a given target location  
344 was chosen *incorrectly*. We initialized the  $\sigma$  parameter as the standard deviation across all stimulus

345 values when a given target location was chosen. The final model fitting procedure however always  
346 used *all* trials, correct and incorrect.

347 To estimate the perceptual bias at each of the four stimulus locations we divided the raw peak  
348 location ( $\mu$ ) by the dispersion ( $\sigma$ ). Thus the perceptual bias is a standardized score in units of the just  
349 noticeable difference. This transformation is important because otherwise raw biases are  
350 confounded by discrimination ability and the analysis puts undue weight on biases for locations  
351 where discrimination is poor. We also quantified the choice probabilities for each location as a  
352 measure of response bias.

353 The MAPS analysis could predict participants' behavioral responses well above chance levels (25%).  
354 Model prediction accuracy in the size eccentricity experiment ranged between  $43.2 \pm 2.3\%$  and  
355  $53.4 \pm 1.7\%$ . Importantly, the model fitting procedure afforded on average a subtle (1-1.8%) but  
356 highly significant improvement (least significant difference:  $t(12)=2.7$ ,  $p=0.018$ ) of prediction  
357 accuracy over a basic model using only the seed parameters for the tuning functions.

#### 358 Comparing tasks experiment

359 We compared perceptual biases measured with MAPS to those measured with the more traditional  
360 method of constant stimuli. Participants first completed a short version of the size bias  
361 measurement using MAPS, comprising two experimental runs of MAPS with 10 blocks each and at a  
362 target eccentricity of  $3.92^\circ$ .

#### 363 *Method of constant stimuli (MCS)*

364 The two runs of MAPS were followed by an MCS run. The stimuli and trial sequence were similar to  
365 the MAPS experiments. However, the task was to compare the size of *one* of the four targets with  
366 the reference and indicate which one was *larger* by means of a button press. In separate blocks  
367 participants were instructed which of the targets they had to judge. The size of the current target  
368 was chosen to be either 0,  $\pm 0.05$ ,  $\pm 0.1$ ,  $\pm 0.2$ ,  $\pm 0.3$ ,  $\pm 0.5$ , or  $\pm 1$  log units and there were 80 trials for each  
369 these 13 possible sizes. The sizes of the three remaining circles (distracters) were chosen from a  
370 Gaussian distribution with a standard deviation of 0.3 log units. There were 80 blocks in the run and  
371 the whole range of possible target sizes appeared in each block in a pseudo-randomized order.

372 We then estimated the perceptual bias by calculating the proportion of trials for each target  
373 stimulus size that the target was reportedly seen as larger than the reference. We fit a cumulative  
374 Gaussian function with three free parameters to these data: 1. The peak of the Gaussian,  $\mu$ , to  
375 estimate the point of subjective equality. 2. The standard deviation of the Gaussian,  $\sigma$ , to quantify  
376 the discrimination uncertainty. 3. The amplitude of the Gaussian,  $\beta$ , to take lapse rates into account.

377 This curve fitting was done using the same optimization procedure as the MAPS model fitting  
378 procedure (Lagarias et al., 1998) to minimize the squared residuals of the fitted model. As with  
379 MAPS, the raw perceptual biases were normalized by dividing the raw point of subjective equality by  
380 the uncertainty.

#### 381 *Two-alternative forced choice (2AFC) experiment*

382 Finally, we validated the perceptual biases estimated by MAPS and MCS in a 2AFC experiment. In  
383 each trial of this experiment participants saw two consecutive stimulus arrays. In one array all  
384 targets were the same size as the reference (*unbiased*), while target sizes in the other array deviated  
385 from the reference (*biased*). Participants were asked to indicate which of the two arrays was  
386 unbiased.

387 For each participant, we constructed individual biased stimulus arrays using the raw peak locations  
388 of the psychometric curves from the two previous experiments. In the MAPS and MCS conditions  
389 biases were based on the estimates derived with the respective methods and trials of these  
390 conditions were randomly interleaved. We further manipulated the 'bias factor,' that is, in different  
391 trials the biases of the target stimuli were multiplied by either 0,  $\pm 1$ ,  $\pm 2$ , or  $\pm 3$ . Because a bias factor  
392 of 1 represents the most critical condition, the actual measured biases from MAPS and MCS, there  
393 were 120 trials for this conditions, twice as many as for the other conditions (although note that bias  
394 factor 0 is physically identical for MAPS and MCS so there were also 120 trials of that condition  
395 overall).

396 Each trial began with 500ms during which only a blue fixation dot was presented against a dark  
397 screen. This was followed by the presentation of the two (biased and unbiased) stimulus arrays for  
398 200ms, interleaved with another 500ms fixation interval. Which interval contained the unbiased  
399 array was counterbalanced across trials.

400 There were 32 trials per block, one for each combination of condition (MAPS vs MCS), bias factor,  
401 and which interval contained the unbiased array. There were 30 blocks in the whole experiment.

#### 402 Retinotopic mapping experiment

403 Ten individuals participated in two sessions of retinotopic mapping in a Siemens Avanto 1.5T MRI  
404 scanner using a 32-channel head coil. The front half of the coil was removed to allow unrestricted  
405 field of view leaving 20 channels. Participants lay supine and watched the mapping stimuli, which  
406 were projected onto a screen (resolution: 1920 x 1080) at the back of the bore, via a mirror mounted  
407 on the head coil. The viewing distance was 68cm.

408 We used a T2\*-weighted multiband 2D echo-planar sequence (Breuer et al., 2005) to acquire 235  
409 functional volumes per run (2.3mm isotropic voxels, 36 slices, FOV=96x96 voxels, TR=1000ms,  
410 TE=55ms, flip angle=75°, acceleration=4). In addition, we collected a T1-weighted anatomical  
411 magnetization-prepared rapid acquisition with gradient echo (MPRAGE) scan with 1 mm isotropic  
412 voxels (TR=2730ms, TE=3.57ms) using the full 32-channel head coil.

#### 413 *Stimuli and task*

414 The procedure for retinotopic mapping was similar to a previous study (Alvarez et al., 2015). In short,  
415 we used a combined wedge and ring stimulus. A polar wedge subtending a polar angle of 12° rotated  
416 in 60 discrete steps (one per second) around the fixation dot (diameter: 0.13° surrounded by a 0.25°  
417 annulus where contrast ramped up linearly). A ring expanded or contracted, both in width and  
418 overall diameter, in 36 logarithmic steps. The maximal eccentricity of the wedge and ring was 8.5°.  
419 There were 3 cycles of wedge rotation and 5 cycles of ring expansion/contraction. Each mapping run  
420 concluded with 45s of a fixation-only period. At all times a low contrast ‘spider web’ pattern was  
421 superimposed on the screen to aid fixation compliance.

422 The wedge and ring parts contained colorful natural images from Google Image search, which  
423 changed every 500ms. They depicted outdoor scenes (tropical beaches, forests, mountains, and rural  
424 landscapes), faces, various animals, and pictures of written script (228 images in total). One picture  
425 depicted the ‘Modern Anderson’ clan tartan. These pictures were always rotated in accordance with  
426 the current orientation of the wedge. Participants were asked to fixate a fixation dot at all times.  
427 With a probability of 0.03 every 200ms the black fixation dot would change color for 200ms to one  
428 of the primary and complementary colors or white followed by another 200ms of black. Participants  
429 were asked to tap their finger when the dot turned red. To also maintain attention on the mapping  
430 stimulus they were asked to tap their finger whenever they saw the tartan image.

431 In alternating runs the wedge rotated in clockwise and counterclockwise directions, while the ring  
432 expanded and contracted, respectively. In each session we collected six such mapping runs and an  
433 additional run to estimate the hemodynamic response function. The latter contained 10 trials each  
434 of which started with a 2s sequence of four natural images from the same set used for mapping.  
435 These were presented in a circular aperture centered on fixation with radius 8.5° visual angle. This  
436 was followed by 28s of the blank screen (fixation and radar screen only).

#### 437 *Population receptive field (pRF) analysis*

438 The method we used for analyzing pRF (Dumoulin and Wandell, 2008) data has been described  
439 previously (Schwarzkopf et al., 2014; Alvarez et al., 2015). The MATLAB toolbox (available at

440 <http://dx.doi.org/10.6084/m9.figshare.1344765>) models the pRF of each voxel as a two-dimensional  
441 Gaussian in visual space and incorporates the hemodynamic response function measured for each  
442 individual participant. It determines the visual field location (in Cartesian coordinates) and the size  
443 (standard deviation) of the pRF plus an overall response amplitude. We delineated the early visual  
444 regions (specifically V1) manually and then extracted the pRF parameter data from each visual field  
445 quadrant. Data were divided into eccentricity bands and we calculated mean pRF size for each band.  
446 Finally, we fit a linear function to the relationship between pRF size and eccentricity to extrapolate  
447 each person's pRF size at the target locations in the behavioral experiments. We also quantified the  
448 macroscopic surface area of each visual quadrant in V1 and normalized it relative to the whole  
449 cortical surface area.

450

## 451 **References**

- 452 Abbey CK, Eckstein MP (2002) Classification image analysis: estimation and statistical inference for  
453 two-alternative forced-choice experiments. *J Vis* 2:66–78.
- 454 Alvarez I, De Haas BA, Clark CA, Rees G, Schwarzkopf DS (2015) Comparing different stimulus  
455 configurations for population receptive field mapping in human fMRI. *Front Hum Neurosci*  
456 9:96.
- 457 Anstis S (1998) Picturing peripheral acuity. *Perception* 27:817–825.
- 458 Ariely D (2001) Seeing Sets: Representation by Statistical Properties. *Psychol Sci* 12:157–162.
- 459 Bedell HE, Johnson CA (1984) The perceived size of targets in the peripheral and central visual fields.  
460 *Ophthalmic Physiol Opt J Br Coll Ophthalmic Opt Optom* 4:123–131.
- 461 Brainard DH (1997) The Psychophysics Toolbox. *Spat Vis* 10:433–436.
- 462 Breuer FA, Blaimer M, Heidemann RM, Mueller MF, Griswold MA, Jakob PM (2005) Controlled  
463 aliasing in parallel imaging results in higher acceleration (CAIPIRINHA) for multi-slice  
464 imaging. *Magn Reson Med* 53:684–691.
- 465 Chong SC, Treisman A (2003) Representation of statistical properties. *Vision Res* 43:393–404.
- 466 Delboeuf J (1892) Sur une nouvelle illusion d'optique. *Acadé " Mie R Sci Lett B-arts Belg Bull* 24:545–  
467 558.
- 468 Dumoulin SO, Wandell BA (2008) Population receptive field estimates in human visual cortex.  
469 *NeuroImage* 39:647–660.
- 470 Fang F, Boyaci H, Kersten D, Murray SO (2008) Attention-dependent representation of a size illusion  
471 in human V1. *Curr Biol* 18:1707–1712.
- 472 Helmholtz H (1867) *Handbuch der Physiologischen Optik*.

- 473 Jogan M, Stocker AA (2014) A new two-alternative forced choice method for the unbiased  
474 characterization of perceptual bias and discriminability. *J Vis* 14:20.
- 475 Lagarias J, Reeds J, Wright M, Wright P (1998) Convergence properties of the Nelder—Mead simplex  
476 method in low dimensions. *SIAM J Optim* 9:112–147.
- 477 Li RW, Levi DM, Klein SA (2004) Perceptual learning improves efficiency by re-tuning the decision  
478 “template” for position discrimination. *Nat Neurosci* 7:178–183.
- 479 Morgan M, Dillenburger B, Raphael S, Solomon JA (2012) Observers can voluntarily shift their  
480 psychometric functions without losing sensitivity. *Atten Percept Psychophys* 74:185–193.
- 481 Morgan MJ, Melmoth D, Solomon JA (2013) Linking hypotheses underlying Class A and Class B  
482 methods. *Vis Neurosci* 30:197–206.
- 483 Murray SO, Boyaci H, Kersten D (2006) The representation of perceived angular size in human  
484 primary visual cortex. *Nat Neurosci* 9:429–434.
- 485 Parkes L, Lund J, Angelucci A, Solomon JA, Morgan M (2001) Compulsory averaging of crowded  
486 orientation signals in human vision. *Nat Neurosci* 4:739–744.
- 487 Pooresmaeili A, Arrighi R, Biagi L, Morrone MC (2013) Blood Oxygen Level-Dependent Activation of  
488 the Primary Visual Cortex Predicts Size Adaptation Illusion. *J Neurosci* 33:15999–16008.
- 489 Pouget A, Dayan P, Zemel R (2000) Information processing with population codes. *Nat Rev Neurosci*  
490 1:125–132.
- 491 Schwarzkopf DS (2015) Where Is Size in the Brain of the Beholder? *Multisensory Res* 28:285–296.
- 492 Schwarzkopf DS, Anderson EJ, Haas B de, White SJ, Rees G (2014) Larger Extrastriate Population  
493 Receptive Fields in Autism Spectrum Disorders. *J Neurosci* 34:2713–2724.
- 494 Schwarzkopf DS, Rees G (2013) Subjective size perception depends on central visual cortical  
495 magnification in human v1. *PLoS One* 8:e60550.
- 496 Schwarzkopf DS, Song C, Rees G (2011) The surface area of human V1 predicts the subjective  
497 experience of object size. *Nat Neurosci* 14:28–30.
- 498 Song C, Schwarzkopf DS, Lutti A, Li B, Kanai R, Rees G (2013a) Effective connectivity within human  
499 primary visual cortex predicts interindividual diversity in illusory perception. *J Neurosci Off J*  
500 *Soc Neurosci* 33:18781–18791.
- 501 Song C, Schwarzkopf DS, Rees G (2013b) Variability in visual cortex size reflects tradeoff between  
502 local orientation sensitivity and global orientation modulation. *Nat Commun* 4:2201.
- 503 Sperandio I, Chouinard PA, Goodale MA (2012) Retinotopic activity in V1 reflects the perceived and  
504 not the retinal size of an afterimage. *Nat Neurosci* 15:540–542.
- 505 Walker D, Vul E (2014) Hierarchical encoding makes individuals in a group seem more attractive.  
506 *Psychol Sci* 25:230–235.
- 507
- 508



509 **Figure Captions**

510

511

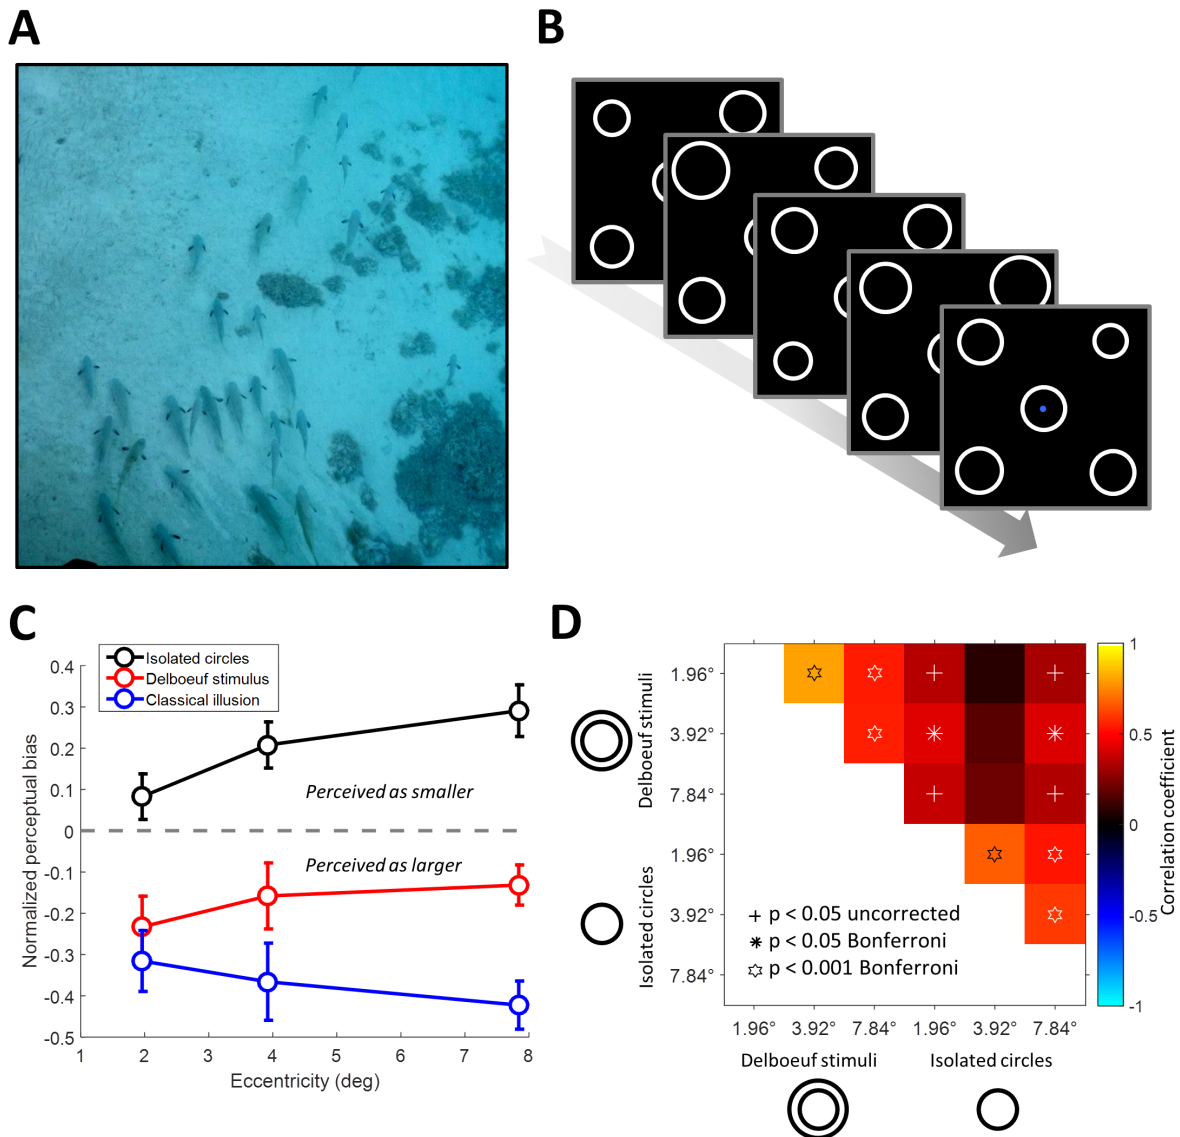

512

513 **Figure 1.** Idiosyncratic biases in size perception. **A.** Visual objects often appear in the presence of  
 514 similar objects. For example, a spearfisherman may be searching this school for the largest fish.  
 515 What is the neural basis for this judgment? **B.** The MAPS task. In each trial, participants fixated on  
 516 the center of the screen and viewed an array of five circles for 200ms. The central circle was  
 517 constant in size, while the others varied across trials. Participants judged which of the circles in the  
 518 four corners appeared most similar in size to the central one. **C.** Average perceptual bias (positive  
 519 and negative: target appears smaller or larger than reference, respectively), across individuals  
 520 plotted against target eccentricity for simple isolated circles (black), contextual Delboeuf stimuli  
 521 (red), and classical illusion strength (blue), that is, the difference in biases measured for the two  
 522 stimulus conditions. Error bars denote  $\pm 1$  standard error of the mean. **D.** Correlation matrix showing  
 523 the relationship of unique patterns of perceptual biases in the two conditions (isolated circles and  
 524 Delboeuf stimuli) and at the three target eccentricities. Color code denotes the correlation

525 coefficient. Symbols denote statistical significance. Crosses:  $p < 0.05$  uncorrected. Asterisks:  $p < 0.05$   
 526 Bonferroni corrected. Hexagrams:  $p < 0.001$  Bonferroni corrected.

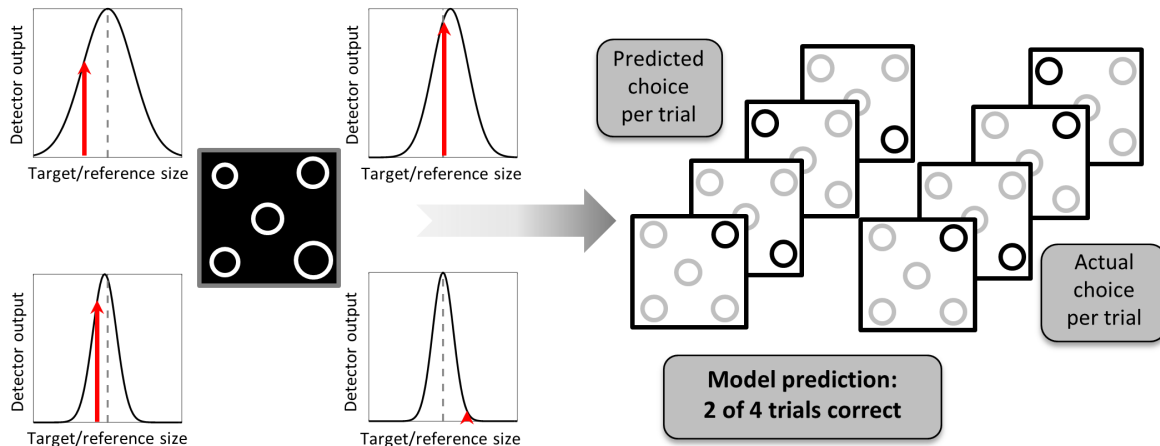

527

528 **Figure 1 – figure supplement 1.** Analysis of behavioral data from MAPS task. The behavioral  
 529 responses in each trial were modeled by an array of four “neural detectors” tuned to stimulus size  
 530 (expressed as the binary logarithm of the ratio between the target and the reference circle  
 531 diameters). Tuning was modeled as a Gaussian curve. The detector showing the strongest output to  
 532 the stimulus (indicated by the red arrows) determined the predicted behavioral response in each  
 533 trial (here, the top-right detector would win). Model fitting minimized the prediction error (in this  
 534 example the model predicted the actual behavioral choice correctly for 50% of trials) across the  
 535 experimental run by adapting the mean and dispersion of each detector.

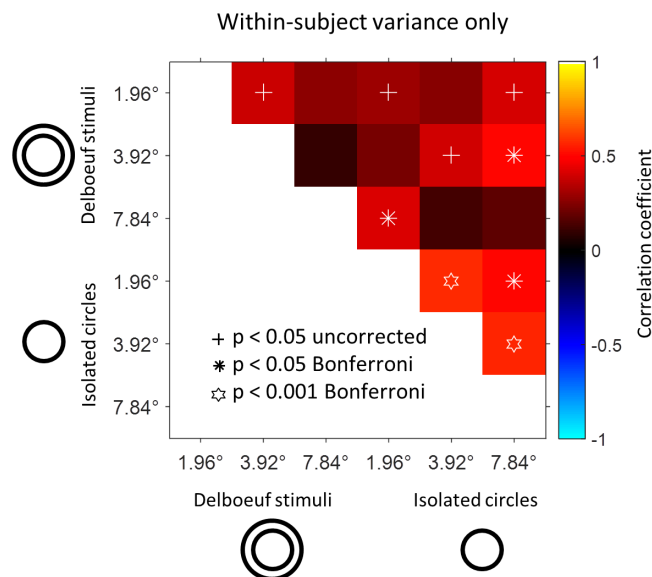

536

537 **Figure 1 – figure supplement 2.** Correlation matrices as in Figure 1D showing the relationship  
 538 between the perceptual biases in the two conditions (isolated circles and Delboeuf stimuli) and at  
 539 the three target eccentricities *after removing between-subject variance*, i.e. the mean across the  
 540 biases for the four targets was *subtracted* from each condition.

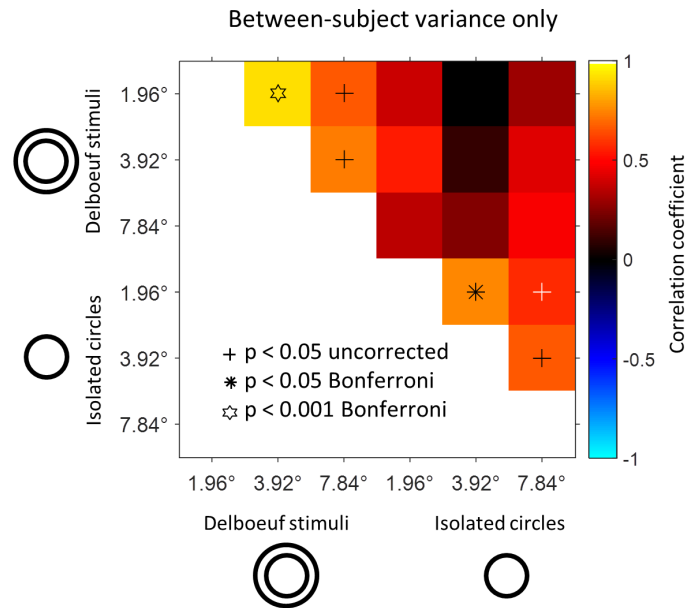

541

542 **Figure 1 – figure supplement 3.** Correlation matrices as in Figure 1D showing the relationship  
 543 between the perceptual biases in the two conditions (isolated circles and Delboeuf stimuli) and at  
 544 the three target eccentricities *after removing the within-subject variance*, i.e. biases were *averaged*  
 545 across the four targets in each condition. Note that statistical power is lower relative to the other  
 546 correlation matrices, because after averaging there is only a quarter of the number of observations.

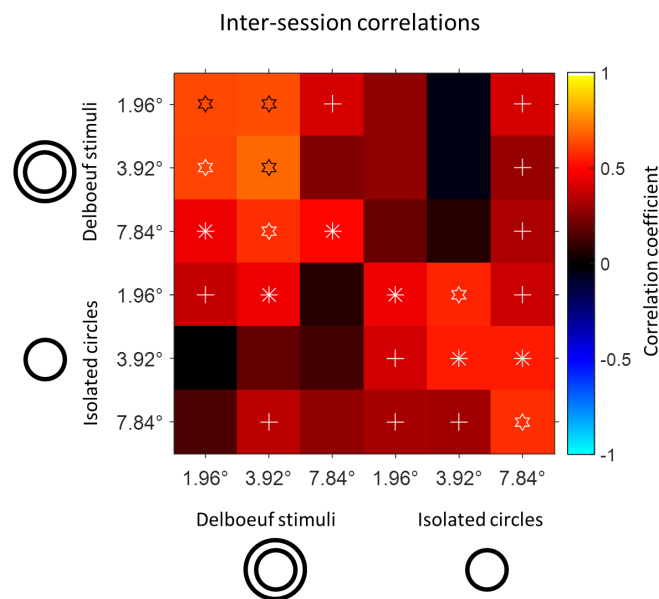

547

548 **Figure 1 – figure supplement 4.** Correlation matrices as in Figure 1D showing the relationship  
 549 between the perceptual biases in the two conditions (isolated circles and Delboeuf stimuli) and at  
 550 the three target eccentricities. Here data from the first and second session of the experiment  
 551 conducted on different days were correlated.

552

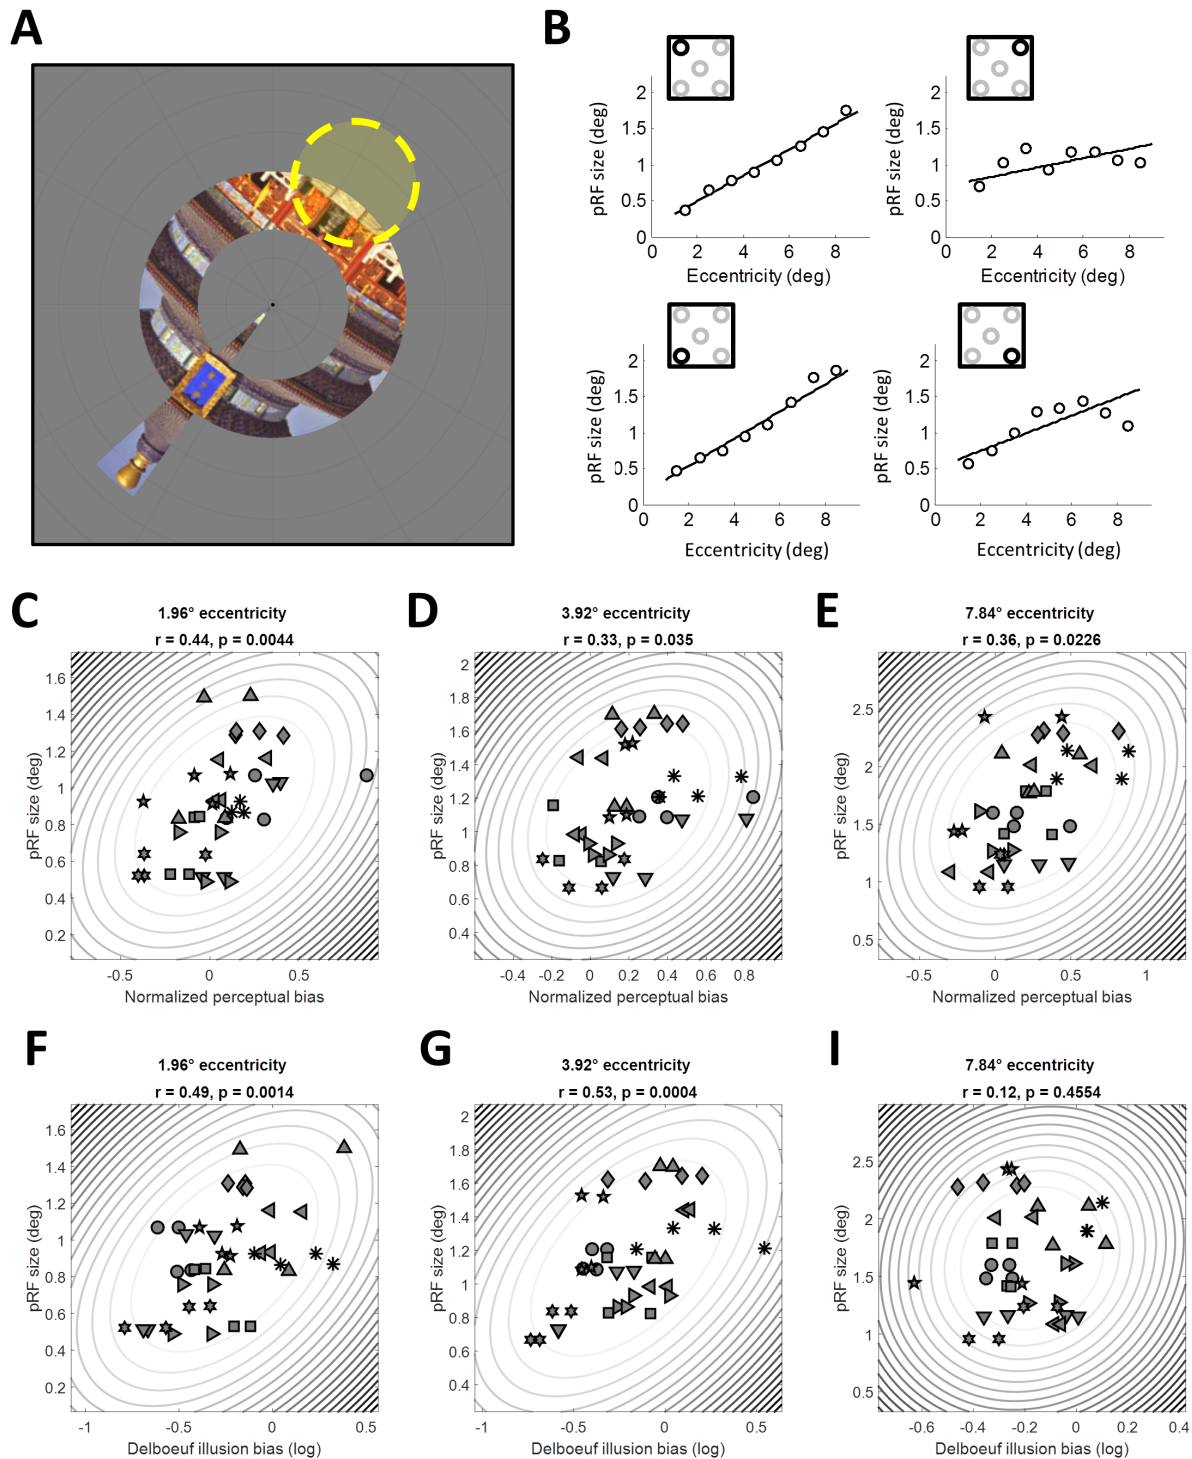

553

554 **Figure 2.** Neural correlates of size perception. **A.** Population receptive field (pRF) mapping with fMRI.  
 555 Participants viewed natural images presented every 500ms within a combined wedge-and-ring  
 556 aperture. In alternating runs the wedge rotated clockwise/counterclockwise in discrete steps (1Hz)  
 557 around the fixation dot while the ring either expanded or contracted. A forward model estimated  
 558 the position and size of the pRF (indicated by yellow circle) that best explained the fMRI response to  
 559 the mapping stimulus. **B.** We estimated the pRF size corresponding to each target location in the  
 560 behavioral experiment by fitting a linear function to pRF sizes averaged within each eccentricity  
 561 band for each visual quadrant and extrapolating the pRF size at the target eccentricities. The four

562 plots show the pRF-eccentricity plots for the four target locations (see insets) in one participant. **C-E.**  
563 PRF size for each stimulus location and participant plotted against their perceptual bias. **F-I.** PRF size  
564 for each stimulus location and participant plotted against their perceptual bias for Delboeuf stimuli.  
565 In **C-I** Symbols denote individual participants. Elliptic contours denote the Mahalanobis distance  
566 from the bivariate mean. The panels show results for stimuli at 1.96° (**C,F**), 3.92° (**D,G**), or 7.84° (**E,I**)  
567 eccentricity.

568

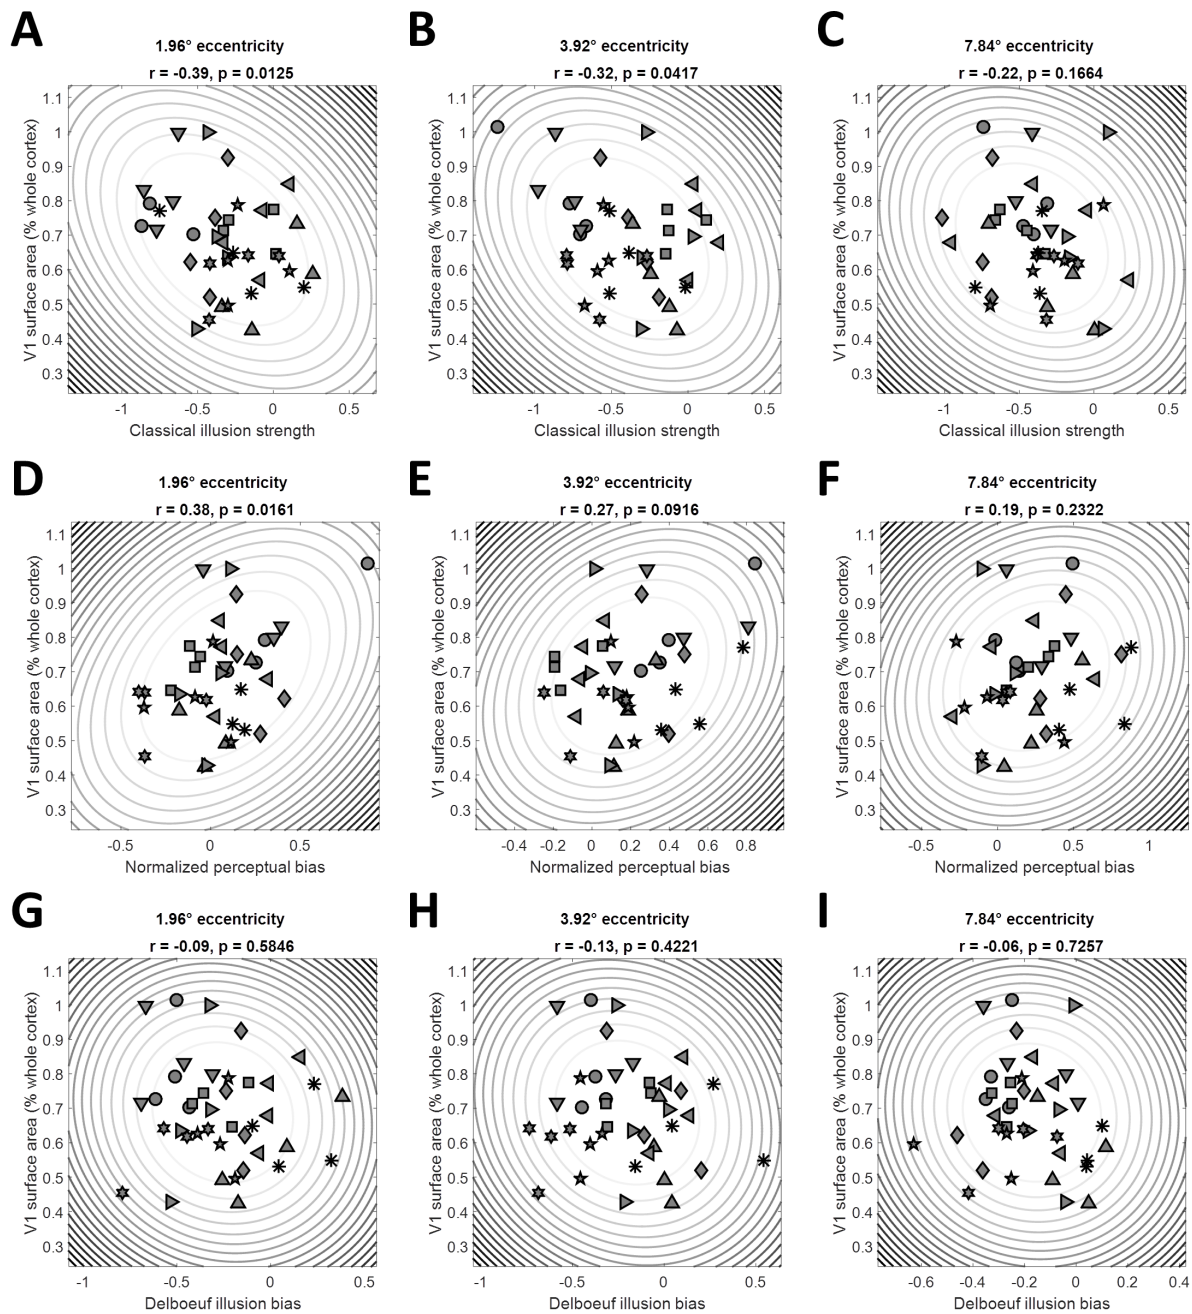

569

570 **Figure 3.** Macroscopic V1 surface area for each participant and each quarter field map in V1 plotted  
571 against the classical Delboeuf illusion strength (A-C), that is, the bias for Delboeuf stimuli minus the  
572 bias for isolated circles. V1 surface area plotted against raw perceptual biases for isolated circles (D-  
573 F) and for the Delboeuf stimuli (G-I). Columns show data for stimuli at 1.96° (A,D,G), 3.92° (B,E,H), or  
574 7.84° (C,F,I) eccentricity. Symbols denote individual participants. Elliptic contours denote the  
575 Mahalanobis distance from the bivariate mean.

576

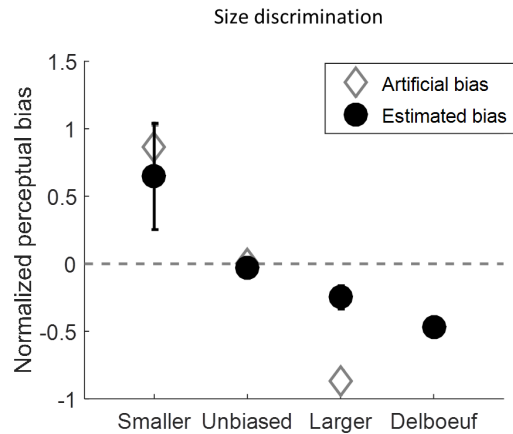

577

578 **Figure 4.** MAPS could reliably identify locations where an artificial bias had been introduced. The  
579 labels on the x-axis indicate the target locations with either positive (larger), negative (smaller) or  
580 zero bias. In the artificial size bias experiment, there was also one run to test the Delboeuf stimuli.  
581 Black circles: Estimated bias averaged across participants. Grey diamonds: Normalized artificial bias  
582 for each location averaged across participants (note that the sign has been inverted as the bias  
583 estimate compensates for the physically introduced bias). Error bars denote  $\pm 1$  standard error of the  
584 mean. The MAPS estimates of perceptual bias went into the same direction as the artificial biases.  
585 However, the magnitude of the estimated bias tended to be smaller than the artificial bias.

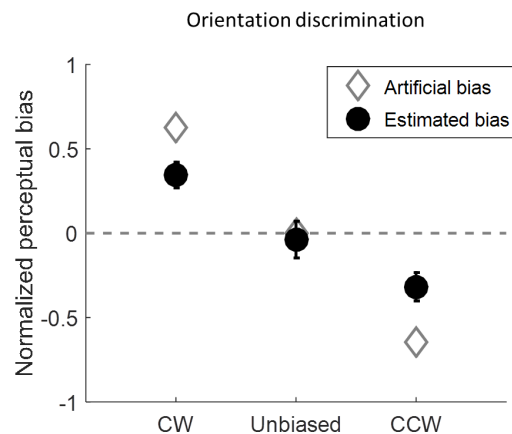

586

587 **Figure 4 – figure supplement 1.** MAPS could reliably identify locations where an artificial bias had  
588 been introduced. The labels on the x-axis indicate the target locations with either positive  
589 (counterclockwise), negative (clockwise) or zero bias. Black circles: Estimated bias averaged across  
590 participants. Grey diamonds: Normalized artificial bias for each location averaged across participants  
591 (note that the sign has been inverted as the bias estimate compensates for the physically introduced  
592 bias). Error bars denote  $\pm 1$  standard error of the mean. CW: clockwise. CCW: counterclockwise.

593

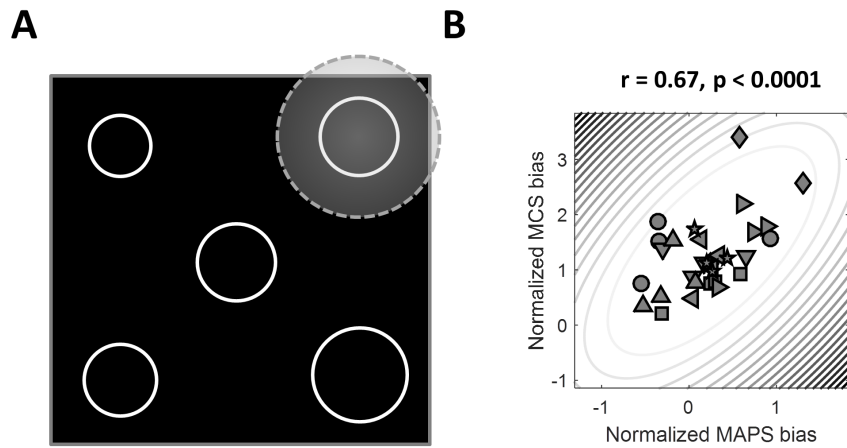

594

595 **Figure 5.** Comparing MAPS with the classical method of constant stimuli (MCS). **A.** In the MCS  
596 experiment participants were instructed before each block to attend to only one target (e.g. here  
597 the upper-right), while the remaining locations contained random distractors. Participants then  
598 judged whether the attended target appeared larger or smaller than the central reference and we  
599 extrapolated the point of subjective equality. **B.** Perceptual biases estimated with MAPS and MCS  
600 correlated strongly. Symbols denote different participants. Elliptic contours denote the Mahalanobis  
601 distance from the bivariate mean.

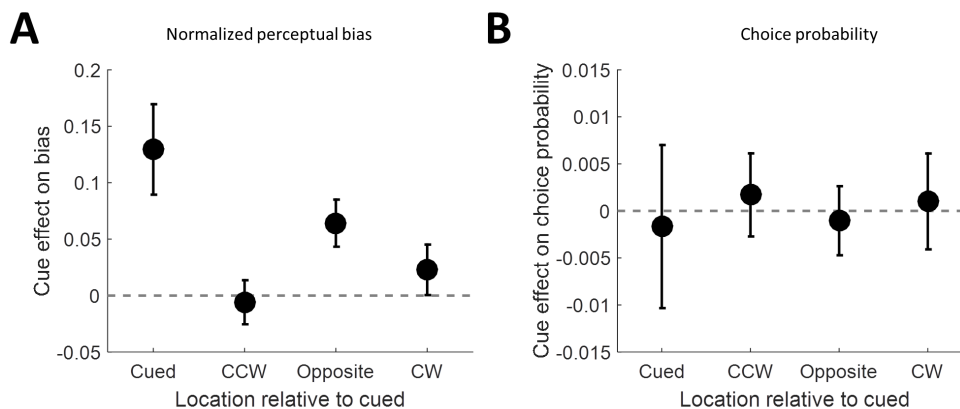

602

603 **Figure 6.** In the attentional cuing experiment, we flashed a brief cue at one of the target locations  
604 before stimulus onset. The effects of cuing on bias (**A**) and choice probability (**B**) are plotted for the  
605 four target locations relative to the cued location. Error bars denote  $\pm 1$  standard error of the mean.  
606 CCW: counterclockwise. CW: clockwise. **A.** Perceptual bias at the cued location was enhanced subtly  
607 (repeated-measures ANOVA on cuing effect for the four locations:  $F(3,51)=3.55$ ,  $p=0.021$ ). **B.** There  
608 was no difference in the frequency of the participants' behavioral choices relative to the cued  
609 location ( $F(3,51)=0.06$ ,  $p=0.982$ ).

610

611

612



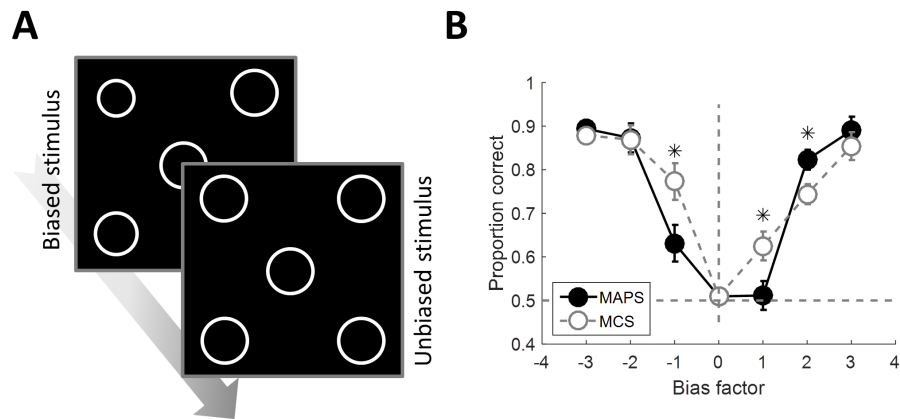

613

614 **Figure 7.** 2AFC experiment. **A.** In each trial, participants viewed two stimulus intervals. One interval  
615 contained an unbiased array in which the size of all five circles was identical. The other contained an  
616 array where the target sizes were determined by the biases measured either with MAPS or MCS,  
617 multiplied by a 'bias factor'. **B.** Performance in 2AFC experiment averaged across participants  
618 plotted against the bias factor for biases derived by MAPS (filled circles) or MCS (open circles). At the  
619 critical bias factor of 1 participants could not distinguish MAPS biases from the unbiased stimulus  
620 but could do so for MCS biases. Error bars denote  $\pm 1$  standard error of the mean difference between  
621 MAPS and MCS at each bias factor. Asterisks denote significant differences at  $p < 0.05$  in a paired two-  
622 tailed t-test between MCS and MAPS at a given bias factor.

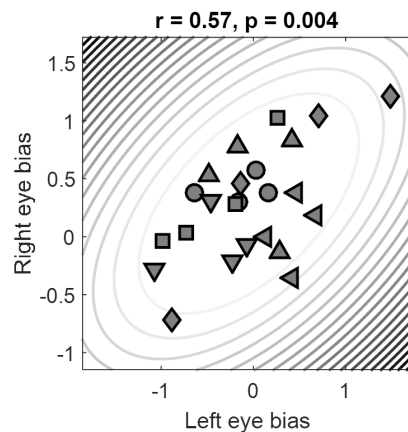

623

624 **Figure 8.** Normalized perceptual biases measured when stimuli were presented dichoptically to the  
625 left or right eye were strongly correlated. Symbols denote individual participants. Elliptic contours  
626 denote the Mahalanobis distance from the bivariate mean.

627
